# Supplementary material for: Iron deficiency and early childhood caries: a systematic review and meta-analysis
Source: PubMed Central journal article supplement — Chin Med J (Engl). 2021 Sep 20;134(23):2832–7. doi: 10.1097/CM9.0000000000001729 (PMC8667991; doi:10.1097/cm9.0000000000001729), 2021-09-20
Supplement: cm9-134-2832-s001.pdf [file cm9-134-2832-s001.pdf]

Supplementary Table 1: Characteristics of the studies included.

| First Author                              | Country | Age                  | Gender,<br>male/famel | N                                                        | Case group       |                                                                                      | Control group    |                                                                                       |
|-------------------------------------------|---------|----------------------|-----------------------|----------------------------------------------------------|------------------|--------------------------------------------------------------------------------------|------------------|---------------------------------------------------------------------------------------|
|                                           |         |                      |                       |                                                          | Prevalence       | Serum ferritin,HGB or<br>MCV                                                         | Prevalence       | Serum ferritin,HGB or<br>MCV                                                          |
| Ramos <i>et al</i> <sup>[13]</sup>        | USA     | <60 months           | 65/58                 | Case: ECC (63)<br>Control: caries-free (60)              | ID: 13/63        | NR                                                                                   | ID: 13/60        | NR                                                                                    |
| Sadeghi <i>et al</i> <sup>[7]</sup>       | India   | 24–71 months         | 117/87                | Case: ECC (93)<br>Control: caries-free (111)             | ID: 0/93         | NR                                                                                   | ID: 0/111        | NR                                                                                    |
| Iranna-Koppal <i>et al</i> <sup>[8]</sup> | India   | 2–6 years            | NR                    | Case: ECC (30)<br>Control: caries-free (30)              | ID: 9/30         | Serum ferritin:<br>29.3 ± 24.3 µg/L                                                  | ID: 3/30         | Serum ferritin:<br>76.1 ± 86.7 µg/L                                                   |
| Lü <i>et al</i> <sup>[11]</sup>           | China   | 1–7 years            | 3430/2836             | Case: ECC (1481)<br>Control: caries-free (4785)          | IDA:<br>411/1481 | NR                                                                                   | IDA:<br>586/4785 | NR                                                                                    |
| Guan <i>et al</i> <sup>[9]</sup>          | China   | 41.09 ± 14.26 months | 105/101               | Case: ECC (111)<br>Control: caries-free (95)             | NR               | HGB: 111.37 ± 8.71 g/L<br>MCV: 78.51 ± 4.31 fL                                       | NR               | HGB: 118.55 ± 7.87 g/L<br>MCV:<br>78.55 ± 3.53 fL                                     |
| Abed <i>et al</i> <sup>[2]</sup>          | Egypt   | 2–6 years            | 67/83                 | Case: ECC (100)<br>Control: caries-free (50)             | NR               | HGB: 100.1 ± 8.3 g/L<br>MCV: 72.56 ± 4.96 fL<br>Serum ferritin:<br>31.86 ± 18.2 µg/L | NR               | HGB: 118 ± 9.1 g/L<br>MCV:<br>80.30 ± 6.35 fL<br>Serum ferritin:<br>40.96 ± 21.1 µg/L |
| Bansal <i>et al</i> <sup>[1]</sup>        | India   | 2–6 years            | 33/ 27                | Case: S-ECC (30)<br>Control: caries-free or deft ≤2 (30) | IDA: 13/30       | HGB: 113 ± 15 g/L<br>MCV: 74 ± 7.5 fL                                                | IDA: 2/30        | HGB: 128 ± 20 g/L<br>MCV: 87.5 ± 11 fL                                                |

|                                          |        |                    |          |                                                |                           |                                                                                      |                         |                                                                                              |
|------------------------------------------|--------|--------------------|----------|------------------------------------------------|---------------------------|--------------------------------------------------------------------------------------|-------------------------|----------------------------------------------------------------------------------------------|
| Jayakumar and Gurunathan <sup>[10]</sup> | India  | <72 months         | NR       | Case: ECC (79)<br>Control: caries-free (35)    | NR                        | Serum ferritin:<br>28.22 ± 20.65 µg/L                                                | NR                      | Serum ferritin:<br>37.40 ± 24.20 µg/L                                                        |
| Rodd <i>et al</i> <sup>[3]</sup>         | Canada | 40.8 ± 14.1 months | 136/130  | Case: ECC (144)<br>Control: caries-free (122)  | ID: 26/140<br>IDA: 34/140 | HGB:<br>109.8 ± 8.7 g/L<br>MCV: 78.3 ± 5.3 fL<br>Serum ferritin:<br>29.1 ± 18.4 µg/L | ID: 3/114<br>IDA: 7/114 | HGB:<br>121.7 ± 7.6 g/L<br>MCV: 78.5 ± 3.8 fL<br>Serum ferritin:<br>30.2 ± 17.4 µg/L         |
| Shamsaddin <i>et al</i> <sup>[12]</sup>  | Iran   | 2–6 years          | 124/118  | Case: ECC (159)<br>Control: caries-free (83)   | NR                        | HGB: 125 ± 24.8 g/L<br>MCV: 76.80 ± 5.64 fL<br>Serum ferritin:<br>34.39 ± 24.93 µg/L | NR                      | HGB:<br>123.7 ± 10.2 g/L<br>MCV:<br>77.61 ± 4.59 fL<br>Serum ferritin:<br>34.63 ± 19.16 µg/L |
| He and Wei <sup>[4]</sup>                | China  | 3–6 years<br>Boys: | 359/241  | Case: ECC (201)<br>Control: caries-free (399)  | IDA:<br>127/201           | NR                                                                                   | IDA:<br>173/399         | NR                                                                                           |
| Gao <sup>[5]</sup>                       | China  | 3–6 years          | 915/ 775 | Case: ECC (1103)<br>Control: caries-free (587) | IDA:<br>31/1048           | NR                                                                                   | IDA:<br>7/536           | NR                                                                                           |

---

ECC= early childhood caries; S-ECC = Severe early childhood caries; ID= iron deficiency; IDA= iron deficiency anemia; HGB= Hemoglobin; MCV= mean corpuscular volume; deft - d = Decayed; e = Extraction due to caries; f = Filled; t = Teeth; N=number; SD= standard deviation; NR=not report.

**Supplementary Table 2: Risk of bias analysis using the Newcastle–Ottawa scale adapted for case-control studies.**

| Reference                                 | Selection |   |   | Comparability |    | Results |   |   | Total |
|-------------------------------------------|-----------|---|---|---------------|----|---------|---|---|-------|
|                                           | 1         | 2 | 3 | 4             | 5  | 6       | 7 | 8 |       |
| <i>Case-control studies</i>               |           |   |   |               |    |         |   |   |       |
| Ramos <i>et al</i> <sup>[13]</sup>        | –         | – | – | –             | ★  | ★       | ★ | ★ | 4     |
| Sadeghi <i>et al</i> <sup>[7]</sup>       | ★         | ★ | – | ★             | ★  | ★       | ★ | – | 6     |
| Iranna-Koppal <i>et al</i> <sup>[8]</sup> | ★         | ★ | – | –             | –  | ★       | ★ | ★ | 5     |
| Lü <i>et al</i> <sup>[11]</sup>           | ★         | – | ★ | –             | –  | ★       | ★ | ★ | 5     |
| Guan <i>et al</i> <sup>[9]</sup>          | ★         | ★ | – | –             | ★  | ★       | ★ | ★ | 6     |
| Abed <i>et al</i> <sup>[2]</sup>          | ★         | ★ | ★ | –             | ★  | ★       | ★ | ★ | 7     |
| Bansal <i>et al</i> <sup>[1]</sup>        | ★         | ★ | – | –             | ★★ | ★       | ★ | ★ | 7     |
| Jayakumar and Gurunathan <sup>[10]</sup>  | ★         | ★ | – | –             | –  | ★       | ★ | ★ | 5     |
| Rodd <i>et al</i> <sup>[3]</sup>          | ★         | ★ | – | –             | ★★ | ★       | ★ | ★ | 7     |
| Shamsaddin <i>et al</i> <sup>[12]</sup>   | ★         | – | – | ★             | –  | –       | ★ | ★ | 4     |
| He and Wei <sup>[4]</sup>                 | ★         | ★ | – | ★             | ★  | –       | ★ | ★ | 6     |
| Gao <sup>[5]</sup>                        | ★         | – | ★ | ★             | –  | ★       | ★ | ★ | 6     |
